# Supplementary material for: Significantly enhanced bioconversion of high titer biomass-derived furfural to furfuryl alcohol by robust endogenous aldehyde reductase in a sustainable way
Source: Royal Society of Chemistry journal article supplement (doi:10.1039/d3gc01417g), 2023-01-01
Supplement: d3gc01417g1.pdf [file d3gc01417g1.pdf]

1 **Supporting Information**

2 **Significantly enhanced bioconversion of high titer biomass-derived**  
3 **furfural to furfuryl alcohol by robust endogenous aldehyde reductase**  
4 **in a sustainable way**

5

6 Junhua Di<sup>a#</sup>, Xiaolong Liao<sup>b#</sup>, Qi Li<sup>b#</sup>, Yu-Cai He<sup>\*a,b</sup>, Cuiluan Ma<sup>b,\*</sup>

7

8 *<sup>a</sup> School of Pharmacy & School of Biological and Food Engineering, Changzhou*  
9 *University, Changzhou, P.R. China.*

10 *<sup>b</sup> State Key Laboratory of Biocatalysis and Enzyme Engineering, Hubei University,*  
11 *Wuhan, P.R. China.*

12

13 **Corresponding authors emails:**

14 [heyucai2001@163.com](mailto:heyucai2001@163.com); [yucaihe@cczu.edu.cn](mailto:yucaihe@cczu.edu.cn) (**Y. He**); [macuiluan@163.com](mailto:macuiluan@163.com) (**C. Ma**)

15

16 **Author contribution**

17 # They contributed to this work equally.

18

## 19 S1. Materials and Methods

### 20 *S1.1 MD simulation of FAL ligand with FucO*

21 FucO-FAL interactions were analyzed using a commercial molecular docking  
22 program (AutoDock Tools 4.2). The MD simulation of FAL ligand with FucO was  
23 predicted. Visualization is done by Pymol software.

24

### 25 *S1.2 Preparation of solid acid catalyst Sn-CRS*

26 Under the vigorous agitation, dry CRS (20.0 kg) was immersed in a 200-L reactor  
27 containing 100 L of 4.0 M H<sub>2</sub>SO<sub>4</sub> at 30 °C for 3 h. The resulting liquor was regulated  
28 to neutrality by addition of NaOH, and H<sub>2</sub>SO<sub>4</sub>-treated CRS (AT-CRS) was then isolated  
29 by filtration and repeatedly washed by using deionized (DI) water to remove the  
30 residues of AT-CRS surface. The AT-CRS (6.0 kg, dry weight) were blended with  
31 SnCl<sub>4</sub>·5H<sub>2</sub>O (3.0 kg) and ethanol (120.0 L) in a 200-L reactor, and the formed mixture  
32 was thoroughly blended via vigorous stirring. Then, the aqueous ammonia (25 wt%)  
33 was dripped slowly into this mixture until the pH of this mixture reached 6.0. This  
34 liquor was dried in a thermostatic drying oven for 12 h at 70 °C, and the obtained sample  
35 was further dried in this oven (90 °C) for 12 h. The dried solid was immersed in 50 L  
36 of H<sub>2</sub>SO<sub>4</sub> (500.0 mM) for 3 h. The acidified solid was then separated from the solution  
37 by vacuum filtration. The recovered solid was dried in the thermostatic drying oven  
38 (110 °C) for 3 h and Sn-CRS was obtained by calcination in a muffle furnace at 550 °C  
39 for 3 h in air.

40

### 41 *S1.3 Characterization of solid acid catalysts Sn-CRS*

42 CRS and Sn-CRS solid acid were characterized by means of XRD, FT-IR  
43 spectroscopy, SEM, NH<sub>3</sub>-TPD, and N<sub>2</sub> adsorption-desorption isotherms analysis.

44

### 45 *S1.4 Chemical biological method catalyzes corncob to produce FOL*

46 FAL was synthesized from corn cob using the prepared solid acid catalyst. Corncob  
47 (75 g/L) was added into the autoclave reactor (Nanjing Zhengxin Equipment Co., P.R.  
48 China) containing 40 mL water, Sn-CRS loading (1.5-3.0 wt%), formic acid (1 wt%)

49 and reacted at 160-180 °C at 5-40 min. Subsequently, the FAL derived from corncob  
50 was reduced to FOL by recombinant *Escherichia coli* FF182 under optimal conditions.  
51 The formed FAL and FOL was measured using HPLC.

52

## 53 **S2. Results and discussion**

### 54 *S2.1 MD simulation of FAL ligand with FucO*

55 Molecular docking (MD) simulation, a potent computational technique, has been  
56 currently utilized to predict geometry of protein-ligand complexes. In this work, the  
57 MD simulation of FAL ligand with FucO was predicted. The 3D visualization was  
58 performed by PyMOL software. Based on the AutoDock 4.2 simulation result (Fig. S2),  
59 the FAL displayed -4.4 kcal/mol binding energy at the binding site containing two  
60 hydrogen-bonds with interacting amino acid residues Gly14 and Ala178. Overall,  
61 binding energy less than 0 kcal/mol suggested that the ligand could bind the receptor  
62 spontaneously, whereas the binding energy below -4.25 kcal/mol indicated there was a  
63 certain binding activity between the receptor and the ligand. The bond distances  
64 between FAL and the respective interacting amino acid residues Gly14 and Ala178  
65 were 2.2 and 2.1 Å, respectively. The above results suggested that ALR in FF182 cells  
66 had a high affinity for furfural and good bioreduction activity.

67

### 68 *S2.2. Characterization of solid acids Sn-CRS*

69 SEM was utilized to measure the surface structure of CRS (support) and Sn-CRS  
70 (catalyst) (Fig. S3). Distinct from the support CRS, catalyst Sn-CRS had voids with  
71 rough and fibrous structures, which was ascribed to the sulfonation that could lead to  
72 the pore collapse and the enlarged internal pore volume. On the surface of Sn-CRS, the  
73 existed particle clumps could be detected, which was attributed to the presence of SnO<sub>2</sub>  
74 (Lewis acid site). The pore and surface features of Sn-CRS was determined with BET  
75 (Table S7). By compared with CRS, Sn-CRS had an enlarger specific surface area  
76 (429.7 m<sup>2</sup>/g), bigger pore volume (0.30 cm<sup>3</sup>/g), and smaller size of pore (2.89 nm). In  
77 the preparation of Sn-CRS, various performance including soaking, sulfonation, and  
78 calcination would eliminate organic and inorganic matters on the carrier CRS, which

79 might expand the pore volume and specific surface area. These alterations would make  
80 more Brønsted and Lewis acid sites exposed, promoting the xylose dehydration and  
81 further improving the productivity of FAL.

82 Sn-CRS was subjected to the FT-IR measurement (Fig. S4A).  $3,435\text{ cm}^{-1}$   
83 corresponded to the stretching of hydroxyl group (-OH).  $2,935\text{ cm}^{-1}$  was associated with  
84 symmetric stretching of methyl group (-CH<sub>3</sub>) and asymmetric stretching of methylene  
85 group (-CH<sub>2</sub>).  $1,640\text{ cm}^{-1}$  was associated with the existence of  $\alpha$ -chitin in CRS. Two  
86 peaks near  $836$  and  $1,475\text{ cm}^{-1}$  were related to the antisymmetric stretching of carbonate  
87 ( $\text{CO}_3^{2-}$ ) vibration, suggesting the presence of residual calcium carbonate ( $\text{CaCO}_3$ ) in  
88 CRS.  $1,025\text{ cm}^{-1}$  was associated with the S=O stretching in Sn-CRS, suggesting that  
89 the successful loading of sulfonic groups as Brønsted acid sites on heterogeneous  
90 catalysts.<sup>4</sup> These sulfonic groups on Sn-CRS might depolymerize xylan in  
91 lignocellulose into xylose molecules and further dehydrate xylose to produce FAL.  $644$   
92  $\text{cm}^{-1}$  was related to tin dioxide, which might act as Lewis acid site. After loading Sn  
93 ions, the absorption peaks shifted slightly to the low wavenumber direction, which  
94 might be caused by the uniform dispersion of tin in CRS. In the XRD spectrum (Fig.  
95 S4B),  $19.3^\circ$  and  $26.6^\circ$  ( $2\theta$ ) were assigned to the diffraction peaks of chitin in CRS. The  
96 diffraction peak of  $\text{CaCO}_3$  was located at  $2\theta = 29.5^\circ$ . Sn-CRS had diffraction peaks  
97 around  $2\theta = 26.5^\circ$ ,  $33.9^\circ$  and  $51.8^\circ$ , which might correspond to tetrahedral tin dioxide.  
98 Distinct from CRS, the diffraction peaks of chitin and  $\text{CaCO}_3$  were not observed in Sn-  
99 CRS. After loading, the pore structure was damaged, resulting in the increase of  
100 crystallinity in Sn-CRS. The acid strength and acid sites of Sn-CRS were characterized  
101 using  $\text{NH}_3$ -TPD analysis (Fig. S4C). In view of the temperature-programmed  
102 desorption (TPD) with ammonia, the weak, medium and strong acid sites on catalysts  
103 might be detected at  $100\text{--}200^\circ\text{C}$ ,  $200\text{--}400^\circ\text{C}$  and  $400\text{--}800^\circ\text{C}$ , respectively. While Sn-  
104 CRS had one main type of acid sites at  $\sim 165^\circ\text{C}$ . These acid sites might be associated  
105 with the biomass hydrolysis and xylose dehydration reaction, which would have a  
106 crucial role in transforming xylan in lignocellulose into xylose and dehydration of  
107 xylose into FAL.

108 Overall, CRS was loose and porous, with a special network of pore structure. Sn-CRS  
109 had a fibrous structure with voids. Tin dioxide (Lewis acid sites) and sulfonic acid  
110 group (Brønsted acid sites) existed on its rough surface. The chemocatalyst had good  
111 thermal stability and was not easy to lose weight in the range of catalytic temperature.  
112 After the biobased carrier CRS was loaded with Sn ions and further sulfonated, Sn-CRS  
113 obtained larger comparative area and pore volume, which resulted in more catalytic  
114 active sites

115

### 116 *S2.3. Chemical biological method catalyzes corncob to produce FOL*

117 Furthermore, Sn-CRS loading (1.5-3.0 wt%), performance temperature (160, 170 or  
118 180 °C), and reaction duration (5-40 min) were examined on the effect of FAL  
119 formation. The Sn-CRS (2.0 wt%) could give the maximum yield (53.4%) of FAL in  
120 water under the temperature of 180 °C and microwave of 600 W within 10 min (Fig.  
121 S5a & S5b). Industrially, heterogeneous chemocatalysts were often recovered and  
122 recycled many times because of their merits of easy recovery and good reusability.<sup>24</sup> In  
123 water, Sn-CRS was recovered and recycled. From 1<sup>st</sup> to 7<sup>th</sup> run, the yield of FAL was  
124 declined from 53.4% to 37.9% (Fig. S5c). The pore structure and active centers of Sn-  
125 CRS might be blocked and covered by some organic impurities generated in this  
126 catalytic process, which would lower the catalytic activity. While Sn-CRS maintained  
127 a high FAL yield after 7 cycles, indicating that Sn-CRS had good reusability. The time-  
128 dependence curves for chemoenzymatically catalyzing corncob into FOL under the  
129 optimum performance conditions was displayed (Fig. S5d). In 40 mL water, 3.0 g  
130 milled corncob (75 g/L), 0.80 g Sn-CRS (2.0 wt%), and 0.40 g formic acid (1.0 wt%)  
131 were placed to an autoclave (100-mL, 300 rpm). Under the temperature of 180 °C and  
132 microwave of 600 W, co-catalysis of corncob (75 g/L) was conducted to yield 103.5  
133 mM FAL (53.4% yield, based on xylan in corncob) within 10 min. The formed FAL  
134 solution was fully transformed to FOL within 60 min. Notably, no 2,5-  
135 bis(hydroxymethyl)furan was detected after bioreduction.

136

137

138

139

## Figure Captions

140

141 **Fig. S1.** Construction procedure of the recombinant strain containing FucO and FDH  
142 (a); Procedures to assemble two genes fucO and fdh with expressing vector [fucO  
143 encodes ALR and fdh encodes FDH] (b); SDS-PAGE (c).

144

145 **Fig. S2.** MD snapshots of the binding sites of FucO (a); The magnified docking poses  
146 obtained for FAL ligands in the homology model generated for FucO (b); Visualization  
147 of FAL with binding pocket of FucO (c).

148

149 **Fig. S3.** SEM image of raw CRS (a) and Sn-CRS (b).

150

151 **Fig. S4.** FTIR image of raw material CRS and Sn-CRS (A); XRD image of raw material  
152 CRS and Sn-CRS (B); NH<sub>3</sub>-TPD image of Sn-CRS (C).

153

154 **Fig. S5.** Effect of Sn-CRS load on the FAL generation [corncob (75 g/L), Sn-CRS (1.5-  
155 3.0 wt%), 0.40 g formic acid (1.0 wt%), 180 °C, 10 min, 600 W] (a); Effects of reaction  
156 temperature and duration on the FAL production [corncob (75 g/L), Sn-CRS (2.0 wt%),  
157 0.40 g formic acid (1.0 wt%), 160-180 °C, 5-40 min, 600 W] (b); The test of Sn-CRS  
158 reusability [corncob (75 g/L), Sn-CRS (2.0 wt%), 0.40 g formic acid (1.0 wt%), 180  
159 °C, 10 min, 600 W] (c); The time dependence of reaction curves for converting corncob  
160 into and FAL and FOL [Chemical conversion: 3.0 g milled corncob (75 g/L), Sn-CRS  
161 (2.0 wt%), and 0.40 g formic acid (1.0 wt%), 180 °C, 10 min, 600 W; Biocatalysis:  
162 whole-cell 0.1 g/mL, 30 °C, pH 7.0] (d).

163 Note: 
$$FAL\ yield(\%) = \frac{FAL\ produced\ (g) \times 0.88 \times 150}{Corncob\ (g) \times 0.341 \times 96} \times 100$$

164

165 **Fig. S6.** Sketch of single ALR expressing vector. [FucO was taken as an example for  
166 single ALR expressing vector. FucO was inserted in MCS-1 under the control of IPTG-

167 inducible T7 promoter].

168

169 **Fig. S7.** Structure of plasmid pRSFDuet-FucOrbsFDH.

170

171 **Fig. S8.** SDS-PAGE [Lane 1: Protein of FF182 (as FucO has a predicted molecular  
172 weight of 40.5 KDa and FDH has an extremely near predicted molecular weight of 40.3  
173 KDa, thus they can't be separated properly); Lane 2: Protein of AF183 (AdhE has a  
174 predicted molecular weight of 96.1 KDa with a weak expression)].

175

176 **Fig. S9.** MS for FOL

177

178 **Fig. S10.**  $^1\text{H}$  NMR for the prepared FOL.

179

## Table Captions

180

181 **Table S1.** Length of genes or molecular weight of enzymes in this study.

182

183 **Table S2.** Recombinant strains of *E. coli* BL21(DE3) constructed in this study.

184

185 **Table S3.** The stability of reductase in whole-cells under different bioreaction pH and  
186 temperature.

187

188 **Table S4.** Primers used in this study.

189

190 **Table S5.** The sequence of FucO and FDH.

191

192 **Table S6.** Related studies about reduction of FAL into FOL via biocatalysis.

193

194 **Table S7.** Surface, pore and catalytic properties of raw material CRS and solid acid  
195 Sn-CRS.



196

197

198

199

200

201

202

203

204

205

206

207

208

209

210

211

212

213

214

215 **Fig. S1.** Construction procedure of the recombinant strain containing FucO and FDH

216 (a); Procedures to assemble two genes fucO and fdh with expressing vector [fucO

217 encodes ALR and fdh encodes FDH] (b); SDS-PAGE (c).

218

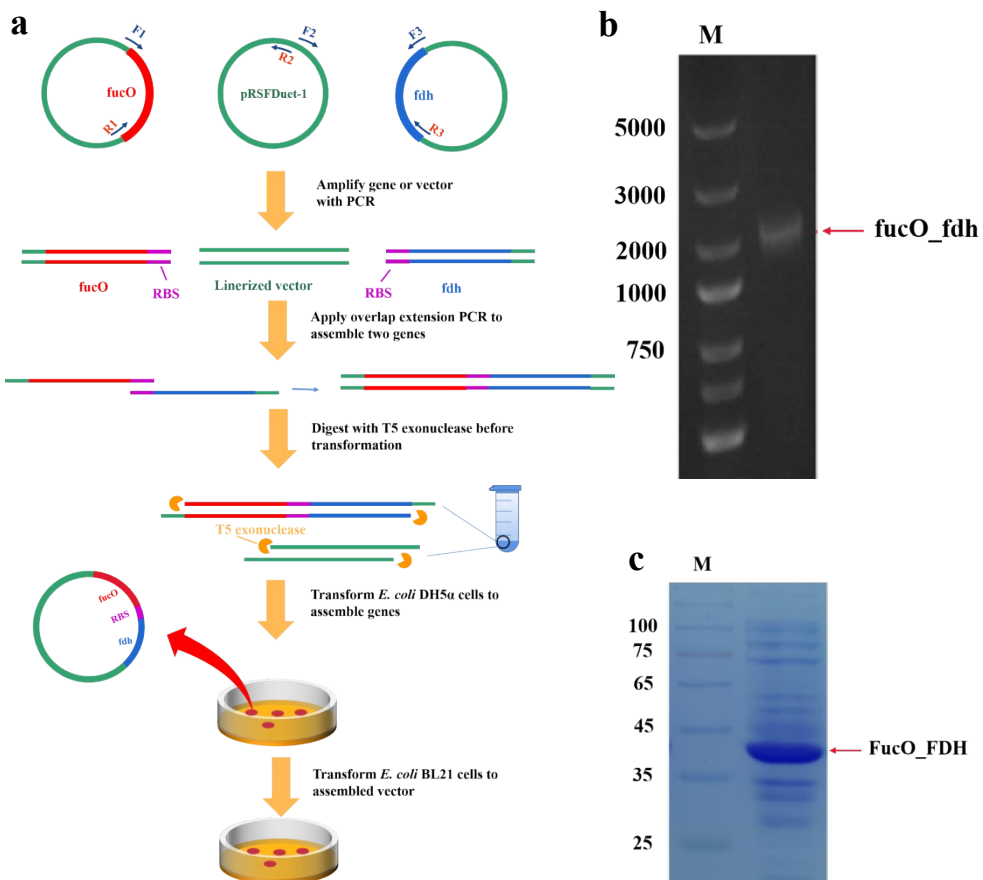

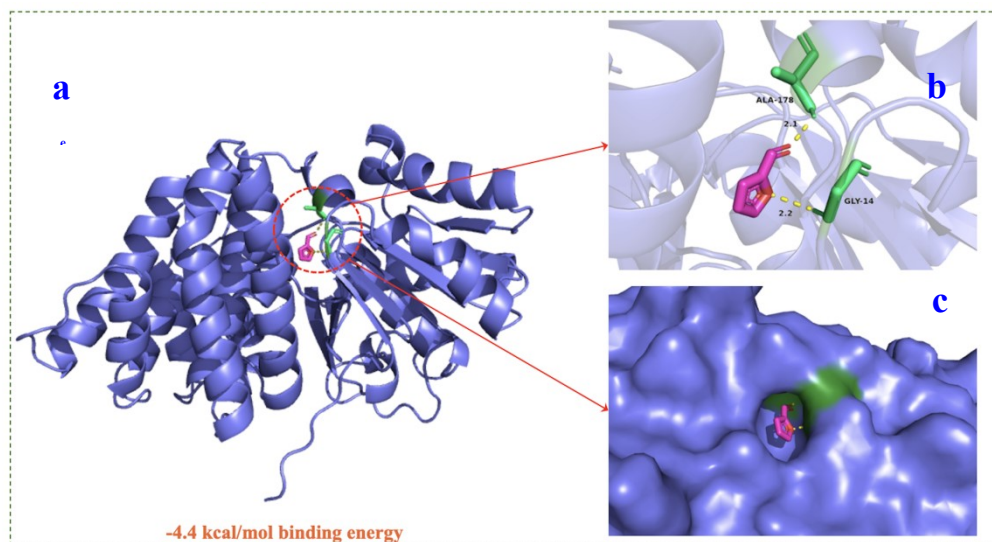

219

220 **Fig. S2.** MD snapshots of the binding sites of FucO (a); The magnified docking poses  
221 obtained for FAL ligands in the homology model generated for FucO (b); Visualization  
222 of FAL with binding pocket of FucO (c).

223

224

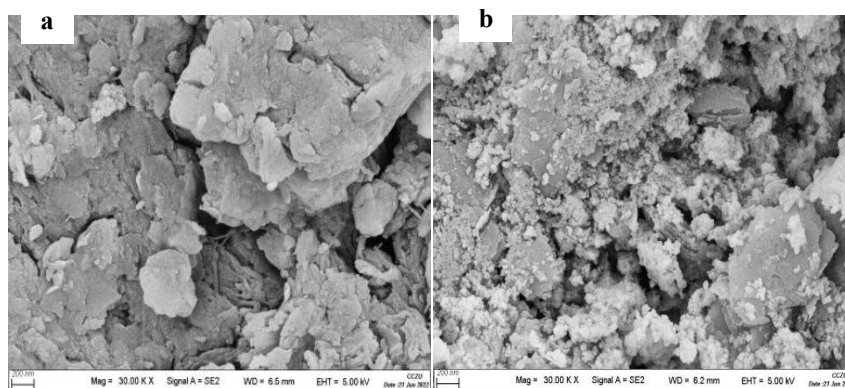

225

**Fig. S3.** SEM image of raw CRS (a) and Sn-CRS (b).

226

227

228

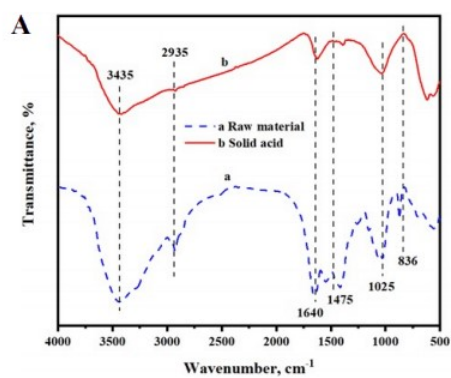

229

230

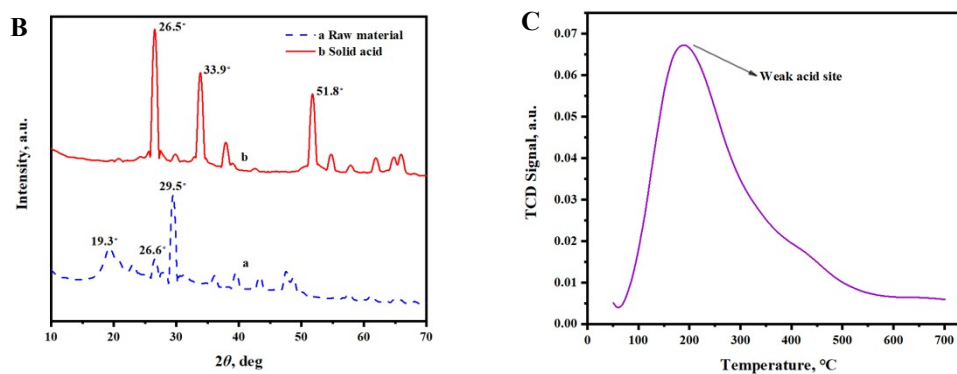

231

232 **Fig. S4.** FTIR image of raw material CRS and Sn-CRS (A); XRD image of raw

233 material CRS and Sn-CRS (B); NH<sub>3</sub>-TPD image of Sn-CRS (C).

234

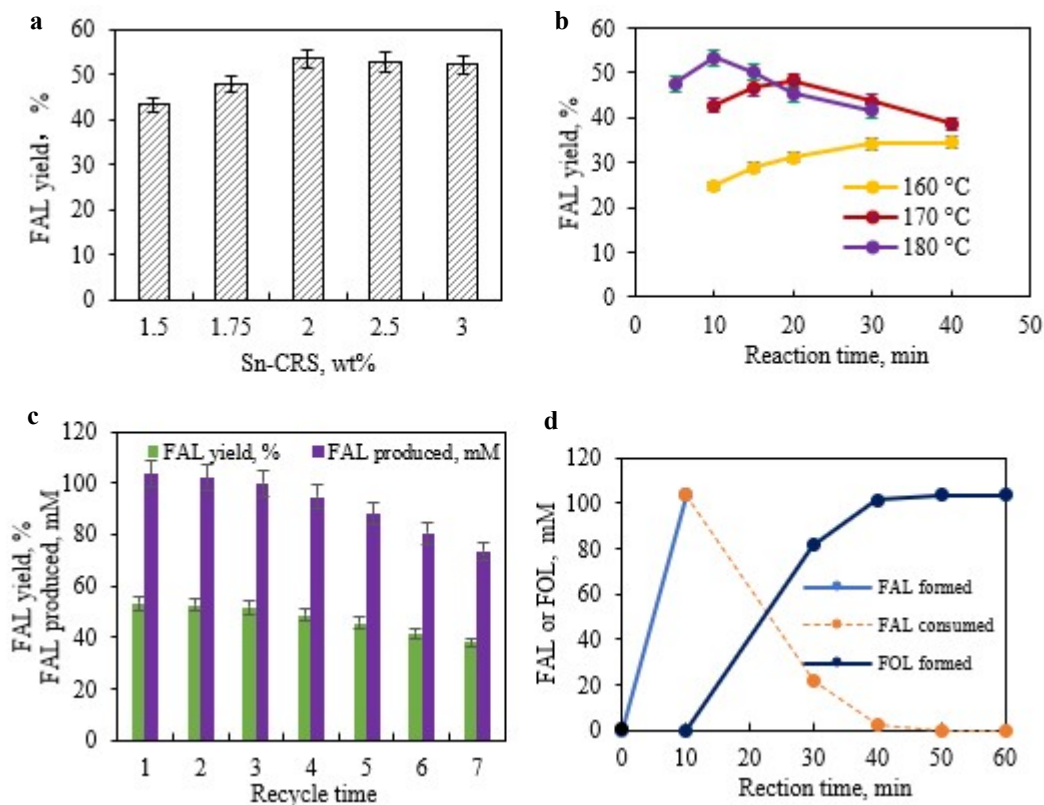

235

236 **Fig. S5.** Effect of Sn-CRS load on the FAL generation [corncob (75 g/L), Sn-CRS (1.5-  
 237 3.0 wt%), 0.40 g formic acid (1.0 wt%), 180 °C, 10 min, 600 W] (a); Effects of reaction  
 238 temperature and duration on the FAL production [corncob (75 g/L), Sn-CRS (2.0 wt%),  
 239 0.40 g formic acid (1.0 wt%), 160-180 °C, 5-40 min, 600 W] (b); The test of Sn-CRS  
 240 reusability [corncob (75 g/L), Sn-CRS (2.0 wt%), 0.40 g formic acid (1.0 wt%), 180  
 241 °C, 10 min, 600 W] (c); The time dependence of reaction curves for converting corncob  
 242 into and FAL and FOL [Chemical conversion: 3.0 g milled corncob (75 g/L), Sn-CRS  
 243 (2.0 wt%), and 0.40 g formic acid (1.0 wt%), 180 °C, 10 min, 600 W; Biocatalysis:  
 244 whole-cell 0.1 g/mL, 30 °C, pH 7.0] (d).

245 Note:

$$FAL\ yield(\%) = \frac{FAL\ produced\ (g) \times 0.88 \times 150}{Corncob\ (g) \times 0.341 \times 96} \times 100$$

246

247

248

249

250

251

252

253

254

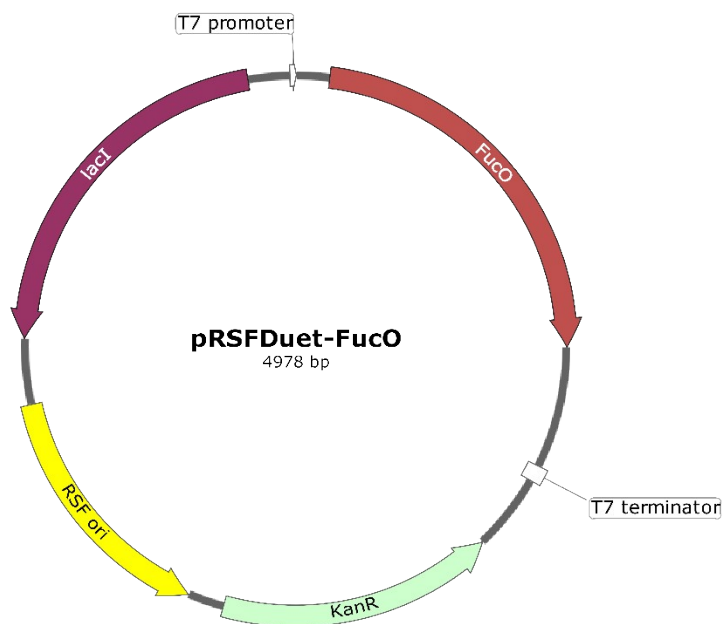

255

256

257 **Fig. S6.** Sketch of single ALR expressing vector. [FucO was taken as an example for  
258 single ALR expressing vector. FucO was inserted in MCS-1 under the control of IPTG-  
259 inducible T7 promoter].

260

261

262

263

264

265

266

267

268

269

270

271

272

273

274

275

276

277

278

279

280

281  
282

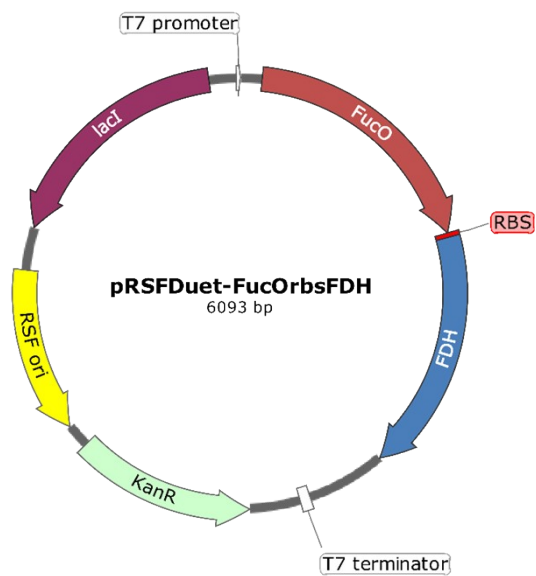

283  
284

**Fig. S7.** Structure of plasmid pRSFDuet-FucOrbsFDH.

285  
286  
287  
288  
289  
290  
291  
292  
293  
294  
295  
296  
297  
298  
299  
300  
301  
302  
303  
304  
305  
306  
307  
308  
309  
310

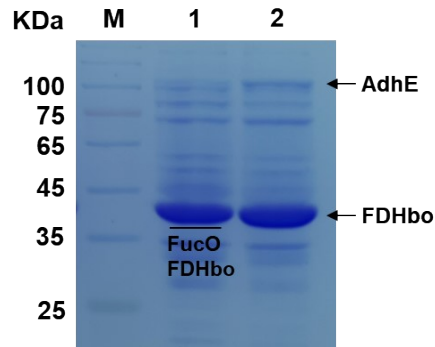

311

312 **Fig. S8.** SDS-PAGE [Lane 1: Protein of FF182 (as FucO has a predicted molecular  
 313 weight of 40.5 KDa and FDH has an extremely near predicted molecular weight of 40.3  
 314 KDa, thus they can't be separated properly); Lane 2: Protein of AF183 (AdhE has a  
 315 predicted molecular weight of 96.1 KDa with a weak expression)].

316

317

318

319

320

321

322

323

324

325

326

327

328

329

330

331

332

333

334

335

336

337

338

339

340

341

342

343

344



345

346

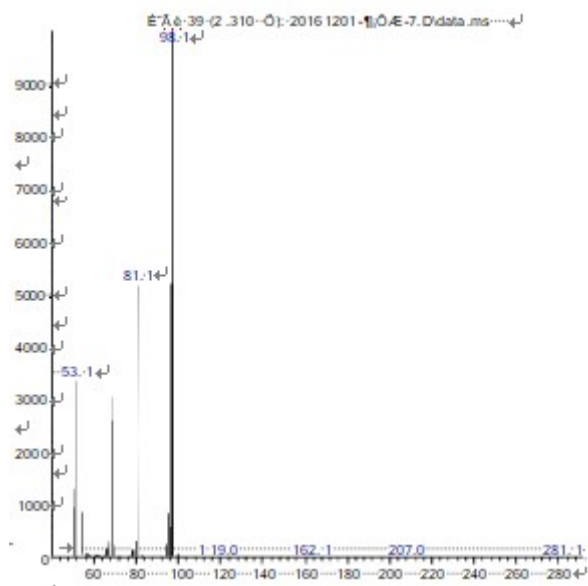

347

348

**Fig. S9.** MS for FOL

349

350

351

352

353

354

355

356

357

358

359

360

361

362

363

364

365

366

367

368

369

370

371

372

373

374

375  
376

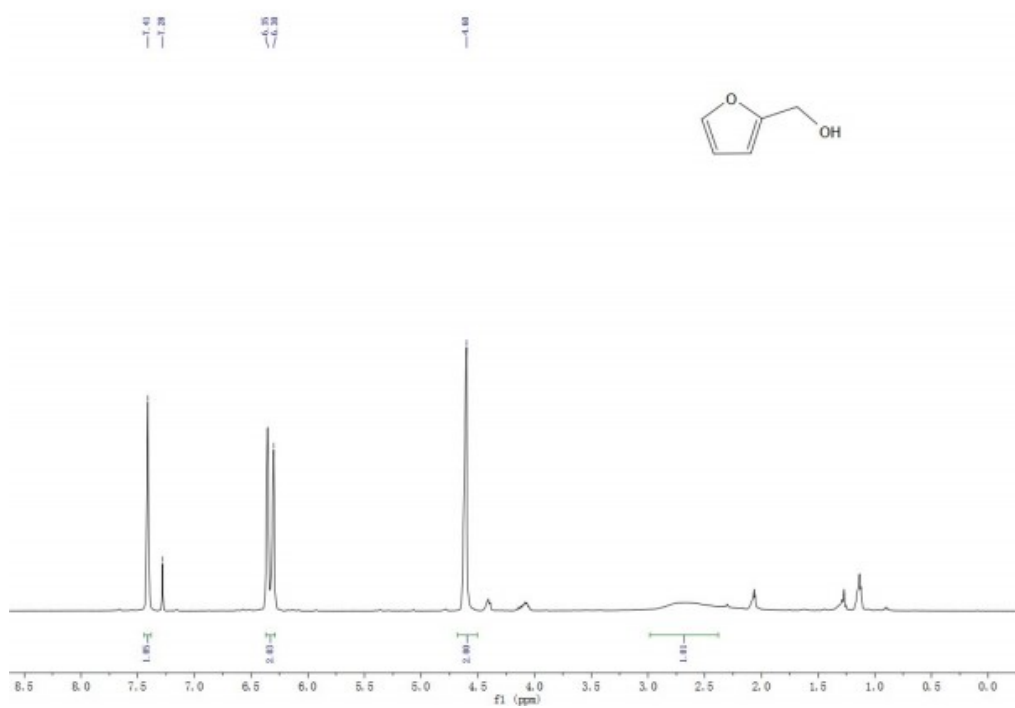

377  
378

**Fig. S10.** <sup>1</sup>H NMR for the prepared FOL.

379  
380  
381  
382  
383  
384  
385  
386  
387  
388  
389  
390  
391  
392  
393  
394  
395  
396  
397  
398  
399  
400  
401  
402

403

404

405

406

407

**Table S1.** Length of genes or molecular weight of enzymes in this study.

| Name | Length (bp) | Molecular weight (Kda) |
|------|-------------|------------------------|
| YiaY | 1152        | 40.4                   |
| YjgB | 1020        | 36.5                   |
| AdhE | 2676        | 96.1                   |
| YqhD | 1164        | 42.1                   |
| AdhP | 1011        | 35.5                   |
| EutE | 1404        | 49.0                   |
| DkgA | 828         | 31.1                   |
| BetA | 1671        | 61.8                   |
| YahK | 1050        | 38.0                   |
| GldA | 1104        | 38.7                   |
| FucO | 1149        | 40.5                   |
| EutG | 1188        | 41.0                   |
| YbbO | 810         | 29.4                   |
| YghA | 885         | 31.5                   |
| FDH  | 1095        | 40.3                   |

408

409

410

411

412 **Table S2.** Recombinant strains of *E. coli* BL21(DE3) constructed in this study.

| Name  | Plasmid             |
|-------|---------------------|
| AdhE  | pRSFDuet-AdhE       |
| AdhP  | pRSFDuet-AdhP       |
| BetA  | pRSFDuet-BetA       |
| DkgA  | pRSFDuet-DkgA       |
| EutE  | pRSFDuet-EutE       |
| EutG  | pRSFDuet-EutG       |
| FucO  | pRSFDuet-FucO       |
| GldA  | pRSFDuet-GldA       |
| YahK  | pRSFDuet-YahK       |
| YbbO  | pRSFDuet-YbbO       |
| YghA  | pRSFDuet-YghA       |
| YiaY  | pRSFDuet-YiaY       |
| YjgB  | pRSFDuet-YjgB       |
| YqhD  | pRSFDuet-YqhD       |
| FF182 | pRSFDuet-FucOrbsFDH |

413

414

415 **Table S3.** The stability of reductase in whole-cells under different bioreaction pH and  
416 temperature.

| <b>pH</b> | <b>Temperature</b> | <b>t<sub>1/2</sub></b> |
|-----------|--------------------|------------------------|
| 6.5       |                    | 1.9 day                |
| 7.0       | 30 °C              | 2.5 day                |
| 7.5       |                    | 1.6 day                |
|           | 4 °C               | 3.8 day                |
| 7.0       | 30 °C              | 2.5 day                |
|           | 45 °C              | 0.42 day               |

417

418

**Table S4.** Primers used in this study.

| <b>Name of primers</b> | <b>Sequence</b>                                  |
|------------------------|--------------------------------------------------|
| AdhE-F                 | caccatcatcaccacATGGCTGTACTAATGTCGCTGAACTT        |
| AdhE-R                 | attcgatcctggctTTAAGCGGATTTTTTCGCTTTTTTCTCAGC     |
| AdhP-F                 | caccatcatcaccacATGAAGGCTGCAGTTGTTACGAAGG         |
| AdhP-R                 | attcgatcctggctTTAGTGACGGAAATCAATCACCATGCG        |
| BetA-F                 | caccatcatcaccacTTGCAATTTGACTACATCATTATTGGTGCC    |
| BetA-R                 | attcgatcctggctTCATTTTTTCGCTCTCACC GG CATC        |
| DkgA-F                 | caccatcatcaccacATGGCTAATCCAACCGTTATTAAGCTACAGG   |
| DkgA-R                 | attcgatcctggctTTAGCCGCCGA ACTGGTCAGG             |
| EutE-F                 | caccatcatcaccacATGAATCAACAGGATATTGAACAGGTGGTG    |
| EutE-R                 | attcgatcctggctTTAAACAATGCGAAACGCATCGACTAATAC     |
| EutG-F                 | caccatcatcaccacATGCAAATGAATTGCAGACCGCG           |
| EutG-R                 | attcgatcctggctTTATTGCGCCGCTGCGTACAG              |
| FucO-F                 | caccatcatcaccacATGGCTAACAGAATGATTCTGAACGAAACG    |
| FucO-R                 | attcgatcctggctTTACCAGGCGGTATGGTAAAGCTCT          |
| GldA-F                 | caccatcatcaccacATGGACCGCATTATTCAATCACC GG        |
| GldA-R                 | attcgatcctggctTTATTCCACTCTTGCAGGAAACGC           |
| YahK-F                 | caccatcatcaccacATGAAGATCAAAGCTGTTGGTGCATATTCC    |
| YahK-R                 | attcgatcctggctTCAGTCTGTTAGTGTGCGATTATCGATAAC     |
| YbbO-F                 | caccatcatcaccacATGACTCATAAAGCAACGGAGATCCTGAC     |
| YbbO-R                 | attcgatcctggctTCACCCCTGCAATATTTTGTCCATCAC        |
| YghA-F                 | caccatcatcaccacATGTCTCATT TAAAAGACCCGACCACG      |
| YghA-R                 | attcgatcctggctTTAACCTAAATGCTCGCCGCCG             |
| YiaY-F                 | caccatcatcaccacATGGCATCTTCAACTTTCTTTATTCCTTCTGTG |
| YiaY-R                 | attcgatcctggctTTACATCGCTGCGCGATAAATCG            |
| YjgB-F                 | caccatcatcaccacATGTCGATGATAAAAAGCTATGCCGCAA      |
| YjgB-R                 | attcgatcctggctTCAATAATCGGCTTTCAACACCACGC         |

|             |                                                     |
|-------------|-----------------------------------------------------|
| YqhD-F      | caccatcatcaccacATGAACAAC <b>TTAATCTGCACACCCCAAC</b> |
| YqhD-R      | attcggatcctggctTTAGCGGGCGGCTTCGTATATACG             |
| FucOrbs-R   | gatatactccttagtaccTTACCAGGCGGTATGGTAAAGCTCT         |
| RbsFDHbo-F  | ggtacctaaggagatatacATGAAAATTGTTCTGGTTCTGTATGATGCAGG |
| RbsFDH-F    | ggtacctaaggagatatacATGAAAATTGTTCTGGTTCTGTATGATGCAGG |
| FDH-R       | attcggatcctggctTCATTTTTTGTTCGTGTTTGCCATAGGC         |
| pRSFDuet-F  | AGCCAGGATCCGAATTCGAGC                               |
| pRSFDuet-R  | GTGGTGATGATGGTGATGGCTGC                             |
| CpRSFDuet-F | GCAGCCATCACCATCATCACCAC                             |
| CpRSFDuet-R | GCTCGAATTCGGATCCTGGCT                               |

---

421 The underlined sequences in lowercase are used for assembly mediated by T5  
422 exonuclease, the sequences highlighted in green contains ribosome site and are also  
423 used for overlap PCR) DNA sequences of codon-optimized enzyme.

424

**Table S5.** The sequence of FucO and FDH.

| Sequence                                                                                                                                                                                                                                                                                                                                                                                                                                                                                                                                                                                                                                                                                                                                                                                                                                                                                                                                                                                                                                                                                                                                                                                                                                                     |
|--------------------------------------------------------------------------------------------------------------------------------------------------------------------------------------------------------------------------------------------------------------------------------------------------------------------------------------------------------------------------------------------------------------------------------------------------------------------------------------------------------------------------------------------------------------------------------------------------------------------------------------------------------------------------------------------------------------------------------------------------------------------------------------------------------------------------------------------------------------------------------------------------------------------------------------------------------------------------------------------------------------------------------------------------------------------------------------------------------------------------------------------------------------------------------------------------------------------------------------------------------------|
| <p><b>FucO</b></p> <p>atggctaacagaatgattctgaacgaaacggcatggttggcggggctgttggggcttaaccgatgaggtgaaac<br/> gccgtggttatcagaaggcgtgatcgtcaccgataaacgctggtgcaatcggcgtggtggcgaaagtgaccgata<br/> agatggatgctgcagggtggcatgggcgatttacgacggcgtagtgcccaaccaacaattactgtcgtcaagaag<br/> ggctcgggtattccagaatagcggcgcggattacgtatgctattggtggtggttctccacaggatacttgtaaagcga<br/> ttggcattatcagcaacaaccggagttgccgatgtgcgtagcctggaagggttccccaccaataaacccagtgtg<br/> ccgattctggcaatccccaccacagcaggcactgcggcagaagtgaccattaactacgtgatcactgacgaagaaaa<br/> cggcgcaagttgttgcgtgatccgcatgatatcccgaggtggcgttattgacgctgacatgatgatggtatgcctc<br/> cagcgtgaaagctgcgacgggtgctgatcgcctcactcatgctattgaggggtatattaccgtggcgcgtggcgct<br/> aaccgatgactgcacattaagcgattgaaatcattgctggggcgtgcgaggatcgggtgctggtgataaggatgcc<br/> ggagaagaaatagcgtcgggcagtatgttgcgggtatgggcttctcgaatgtgggttagggtggtgcatggtatggc<br/> gcatccactgggcgcgtttataaactccacacgggtgtgcaaacgccatcctgctaccgatgcatgcctataacg<br/> ctgacttaccggtgagaagtaccgcgatatcgcgcgcttatgggcgtgaaagtggaaggtatgagcctggaagagg<br/> cgcgtaatgccgctgttgaagcgggtttgctctcaaccgtgatgctgggtattccgccacattgcgtgatgttgggtacg<br/> caaggaagacattccggcactggcgcaggcggcactgaatgatgttgtaccggtggcaaccgcgtgaagcaacgc<br/> ttgaggatattgtagagctttaccataccgctggtaa</p> |
| <p><b>FDH</b></p> <p>atgaaaattgttctggttctgtatgatgcaggtaaacaatgcagcagatgaagaaaaactgtatggctgcaccgaaaataaa<br/> ctgggtattgcaaattggctgaaagatcagggtcatgaactgattaccaccagtataaagaagggtgtaatagcgttct<br/> ggatcagcatattccggatgccgatattatcattaccacaccgttcatccggcatatatcaccaaagaacgatcgacaa<br/> agccaaaaaactgaaactggtgtgttgcgggtgttggtagcgtatcatattgatctggattatatcaatcagaccggcaaa<br/> aaaatcagcgtgctggaagtaccggtagcaatgttgttagcgttcgagaacatgttgttatgaccatgctggttctggtgc<br/> gcaatttgttccggcactgagcagattataacatgattgggaagtgcagccattgcaaaagatgcctatgatattga<br/> aggtaaaaccattgcaaccattggtgcaggtcgtattggtatcgtgttctggaacgtcgttccgtttaatccgaaagaa<br/> ctgctgtattatgattatcaggcactgccgaaagatgccgaagaaaaagttggtgcccgctggttgaaaatattgaagaa<br/> ctggttgacagggcgatattgtaccgttaatgaccgctgcatgccggtacaaaaggctctgattaacaaagagctgct<br/> gagcaaatcaaaaaagggtgcatggctggttaatccgcacgtggtgcaattgtgttccggaagatgttcagcagcac</p>                                                                                                                                                                                                                                                                                                                                                     |



---

tggaaagcggtcagctgcgtggttatggtggtgatgtttggttccgcagccagcaccgaaagatcatccgtggcgtgat  
atgcgtaacaaatatggtgccggtaatgcaatgacaccgattatagcgggtacaaccctggatgcacagaccggtatg  
cacagggcacaaaaacattctgaaagttttttaccggcaaattcgattatcgtccgcaggatatttctgctgaatggt  
gaatatgtaccaaagcctatggcaaacacgacaaaaaatga

---

426

427

428

429

430 **Table S6.** Related studies about reduction of FAL into FOL via biocatalysis.

| <b>Catalyst</b>          | <b>Substrate</b> | <b>Substrate concentration</b> | <b>Time</b> | <b>Product yield</b> | <b>Reference</b> |
|--------------------------|------------------|--------------------------------|-------------|----------------------|------------------|
| <i>M. guilliermondii</i> | FAL              | 200 mM                         | 7 h         | 80%                  | 45               |
| <i>S. cerevisiae</i>     | FAL              | 50 mM                          | 24 h        | 88%                  | 46               |
| <i>B. coagulans</i>      | FAL              | 40 mM                          | 24 h        | 95%                  | 47               |
| CCZU-A13 cells           | FAL              | 200 mM                         | 12 h        | 94%                  | 48               |
| CCZU-K14 cell            | FAL              | 200 mM                         | 24 h        | 100%                 | 49               |
| FF182 cell               | FAL              | 300 mM                         | 3 h         | 100%                 | -                |

431

432

433

434 **Table S7** Surface, pore and catalytic properties of raw material CRS and solid acid  
 435 Sn-CRS.

| Solid sample |          | BET surface area (m <sup>2</sup> /g) | Pore volume (cm <sup>3</sup> /g) | Pore size (nm) |
|--------------|----------|--------------------------------------|----------------------------------|----------------|
| Raw          | material | 94.1                                 | 0.11                             | 4.65           |
| CRS          |          |                                      |                                  |                |
| Sn-CRS       |          | 429.7                                | 0.30                             | 2.89           |

436
